# Supplementary material for: Dynamic Reliability Analysis of Rotary Steering Drilling System
Source: Copernicus journal article supplement (doi:10.5194/ms-10-79-2019), 2019-02-19
Supplement: Supplementary file 1 [file ms-10-79-2019-supplement.pdf]

Supplement of Mech. Sci., 10, 79–90, 2019  
<https://doi.org/10.5194/ms-10-79-2019-supplement>  
© Author(s) 2019. This work is distributed under  
the Creative Commons Attribution 4.0 License.

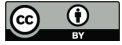

*Supplement of*

## **Dynamic Reliability Analysis of Rotary Steering Drilling System**

**Leilei Huang et al.**

*Correspondence to:* Qilong Xue (xql@cugb.edu.cn)

The copyright of individual parts of the supplement might differ from the CC BY 4.0 License.
